# Supplementary material for: Improved electronic interaction and dispersing effect derived from the F-doped TiO2support on RuOxto boost the electrocatalytic oxygen evolution performance
Source: Royal Society of Chemistry journal article supplement (doi:10.1039/d2nj06051e), 2023-01-01
Supplement: d2nj06051e1.pdf [file d2nj06051e1.pdf]

*New Journal of Chemistry*

Electronic Supplementary Information

**Improved electronic interaction and dispersing effect derived from the F-doped TiO<sub>2</sub> support on RuO<sub>x</sub> to boost the electrocatalytic oxygen evolution performance**

Hongrui Jia,<sup>‡</sup><sup>a</sup> Xin Yang,<sup>‡</sup><sup>a</sup> Xiangshe Meng,<sup>a</sup> Guoxin Zhang<sup>a</sup> and Guoqiang Li<sup>\*a</sup>

<sup>a</sup> Al-ion Battery Research Center, College of Energy Storage Technology, Shandong University of Science and Technology, Qingdao 266590, China

<sup>‡</sup> These two authors contributed equally to this work.

Email: ligq@sdust.edu.cn

## 1. Experimental Section

### 1.1. Materials

The chemical reagents  $\text{RuCl}_3 \cdot x\text{H}_2\text{O}$  ( $x = 3$ ),  $\text{TiO}_2$  (5-10 nm, Anatase),  $\text{NH}_4\text{F}$ ,  $\text{CO}(\text{NH}_2)_2$ ,  $\text{NaH}_2\text{PO}_2 \cdot \text{H}_2\text{O}$  and  $\text{NaBH}_4$  were purchased from the Aladdin Co., Ltd. Ethanol and  $\text{H}_2\text{SO}_4$  solutions were purchased from the Beijing Chemical Co. and used without further purification. 5 wt% Nafion® ionomer was purchased from the DuPont Co. Commercial  $\text{IrO}_2$  denoted as  $\text{IrO}_2(\text{CM})$  was purchased from the Alfa Aesar Chemical Co., Ltd. Commercial Pt/C (20 wt%Pt) denoted as Pt/C(CM) was purchased from the Johnson Matthey Company. F- $\text{SnO}_2$  (FTO) conductive glass was purchased from the NSG Co., Ltd. All solutions in this work were modulated using Millipore-MiliQ water (resistivity:  $\rho > 18 \text{ M}\Omega \cdot \text{cm}$ ).

### 1.2. Catalysts Preparation

A series of F-doped  $\text{TiO}_2$  (F- $\text{TiO}_2$ ) supports were synthesized through high-temperature heating  $\text{TiO}_2$  with  $\text{NH}_4\text{F}$ , the calcination temperatures were 300, 350, 400 and 500 °C, the mass ratios of  $\text{TiO}_2 : \text{NH}_4\text{F} = 1:5, 1:10, 1:15, 1:20$ . In detail, the  $\text{TiO}_2$  powder was firstly grounded with  $\text{NH}_4\text{F}$  powder. Then, the powder mixture was placed in a tubular oven and reacted for 2 h under the  $\text{N}_2$  atmosphere to obtain F- $\text{TiO}_2$ . The N- $\text{TiO}_2$  and P- $\text{TiO}_2$  counterparts were also synthesized through the similar procedure except for the different dopants, including  $\text{CO}(\text{NH}_2)_2$  and  $\text{NaH}_2\text{PO}_2$ , the synthesis conditions refer to the F- $\text{TiO}_2$  support.

The supported  $\text{RuO}_x/\text{F-TiO}_2$  catalyst with Ru content of 50 wt% was prepared through a  $\text{NaBH}_4$  reduction route. Firstly, 50 mg F- $\text{TiO}_2$  was ultrasonically dispersed in 100 mL deionized water for 1 h. Then, a certain amount of  $\text{RuCl}_3 \cdot 3\text{H}_2\text{O}$  was added to the resulting suspension and stirred for 1 h. Subsequently, a certain amount of aqueous  $\text{NaBH}_4$  solution ( $n\text{NaBH}_4 : n\text{RuCl}_3 = 8:1$ ) was quickly injected into the above suspension and stirred continuously for 3 h. Finally, the suspension was filtered and washed with deionized water and ethanol, then dried at 60 °C in the oven overnight to obtain the target catalyst.  $\text{RuO}_x/\text{N-TiO}_2$  and  $\text{RuO}_x/\text{P-TiO}_2$  catalysts were prepared through the similar procedure. Pure  $\text{RuO}_x$  catalyst denoted as  $\text{RuO}_x(\text{hm})$  was

prepared through the similar procedure except for the addition of support. IrO<sub>2</sub>(CM) catalyst was adopted as comparison.

### 1.3. Physical Characterization

**Electrical Conductivity Measurement:** The electrical conductivity of F-TiO<sub>2</sub> support was measured by the four-point probe technique (RTS-8, China).

**X-ray Diffraction (XRD):** The phase composition of the catalysts was investigated by XRD characterization using D8-Advance X-ray diffractometer (BRUKER Company, Germany) with the Cu K<sub>α</sub> (1.5405 Å) as radiation source operating at 40 kV and 200 mA. Diffraction peaks were recorded in the range of 2θ = 20-90 ° at the scanning rate of 2 ° min<sup>-1</sup>.

**X-ray Photoelectron Spectroscopy (XPS):** The surface elemental composition, chemical state and electronic structure of the catalysts were investigated by XPS spectrometer (Kratos Ltd. XSAM-800, UK) with Al K<sub>α</sub> monochromatic source. All the binding energies were calibrated using the C 1s binding energy peak (284.6 eV) as the reference.

**Transmission Electron Microscopy (TEM):** The morphology and composition of the catalysts were characterized with TEM, high-resolution transmission electron microscopy (HRTEM), high-angle annular dark-field scanning TEM (HAADF-STEM), elemental mapping analysis and energy-dispersive X-ray spectroscopy (EDX) by Tecnai G2 F20 S-TWIN electron microscope (FEI Company, USA) working at an accelerating voltage of 200 kV.

**Inductively Coupled Plasma Optical Emission Spectroscopy (ICP-OES):** ICP-OES (X Series 2, Thermo Scientific USA) analysis was applied to quantify the electrooxidative-dissolution of Ru after the stability test.

### 1.4. Electrochemical Measurement

**Three-electrode test:** Electrochemical performance measurements were firstly investigated with conventional three-electrode setup operated on Princeton Applied Research Model273 Potentiostat/Galvanostat. The electrolyte solution was 0.5 mol L<sup>-1</sup> H<sub>2</sub>SO<sub>4</sub> purged with high-purity N<sub>2</sub> for at least 30 min. The working electrode

substrate, counter electrode and reference electrode were glassy carbon electrode (GC, 3 mm diameter), Pt plate and saturated calomel electrode (Hg/Hg<sub>2</sub>Cl<sub>2</sub>; SCE), respectively. All the potentials reported were calibrated with the reversible hydrogen electrode (RHE) that  $E(\text{RHE}) = E(\text{SCE}) + 0.242 \text{ V} + 0.059 \cdot \text{pH}$ . To prepare the working electrode: firstly, 3 mg of the catalyst was ultrasonically dispersed in 315  $\mu\text{L}$  solutions containing of 15  $\mu\text{L}$  Nafion® solution and 300  $\mu\text{L}$  ethanol solution for at least 30 min; secondly, 2.23  $\mu\text{L}$  catalyst inks was pipetted and spread on the glassy carbon substrate; lastly, the electrode was obtained after the solvent volatilized with the catalyst loading was 0.3  $\text{mg cm}^{-2}$ .

The outer charge ( $Q_{\text{outer}}$ ) was calculated through fitting the cyclic voltammetry (CV) curves (0.40-1.40 V) obtained at the scanning rate of 300  $\text{mV s}^{-1}$ .

Linear sweep voltammetry (LSV) curves for OER were recorded in a potential window between 1.10 and 1.70 V at the scanning rate of 5  $\text{mV s}^{-1}$  in N<sub>2</sub>-saturated H<sub>2</sub>SO<sub>4</sub> solution at room temperature. All data were corrected for 95%  $iR$  potential drop,  $R$  is the solution resistance.

The mass activity was normalized with the equation as follows:

$$i_{\text{Mass activity}} = \frac{i_{\text{Measured}}}{m_{\text{Ru}}} \quad (1)$$

where  $m_{\text{Ru}}$  is the mass loading for all the Ru element.

The electrochemical impedance spectra (EIS) measurements were conducted on an Autolab potentiostat in the frequency range from 0.1 Hz to 10 kHz at the potential of 1.50 V, a 10 mV amplitude of sinusoidal potential perturbation was employed during the measurements.

The galvanostatic tests were measured using the FTO conductive glass as the working electrode substrate. Testing conditions included a constant current density of 10  $\text{mA cm}^{-2}$  in N<sub>2</sub>-saturated H<sub>2</sub>SO<sub>4</sub> solution at room temperature, and the catalyst loading was also 0.3  $\text{mg cm}^{-2}$ .

**Two-electrode test:** Two-electrode overall water splitting tests were performed with RuO<sub>x</sub>/F-TiO<sub>2</sub>, RuO<sub>x</sub>(hm) or IrO<sub>2</sub>(CM) as the anode catalyst, and Pt/C(CM) as the cathode catalyst. FTO was used as the working electrode substrate. The anode catalyst

loading was  $0.3 \text{ mg cm}^{-2}$ , and the cathode catalyst loading was  $0.1 \text{ mg cm}^{-2}$ . LSV experiments were performed with the voltage window ranged from 1.0 to 2.0 V at the scanning rate of  $5 \text{ mV s}^{-1}$  in  $0.5 \text{ M H}_2\text{SO}_4$  at room temperature. The galvanostatic test was performed at the constant current density of  $10 \text{ mA cm}^{-2}$  for 20 h.

## 2. Figures and Tables

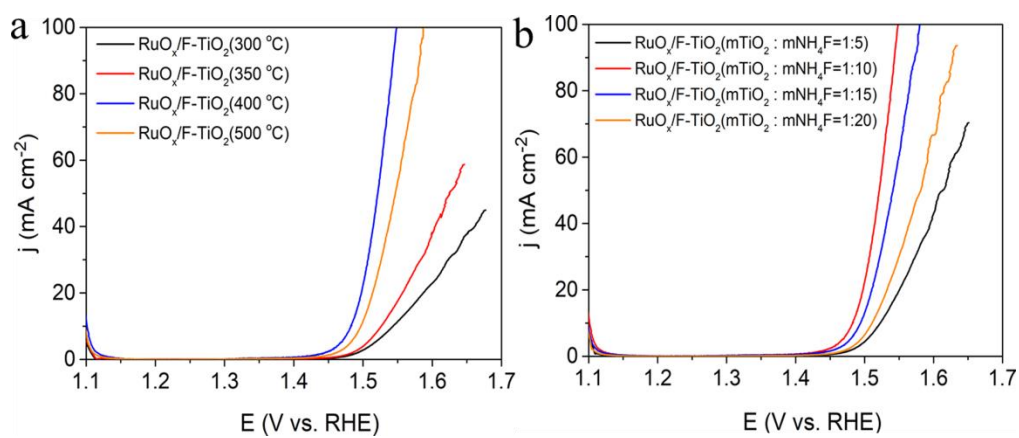

**Fig. S1** LSV curves of RuO<sub>x</sub>/F-TiO<sub>2</sub> with varying (a) calcination temperature of F-TiO<sub>2</sub> and (b) mass ratio of TiO<sub>2</sub> : NH<sub>4</sub>F.

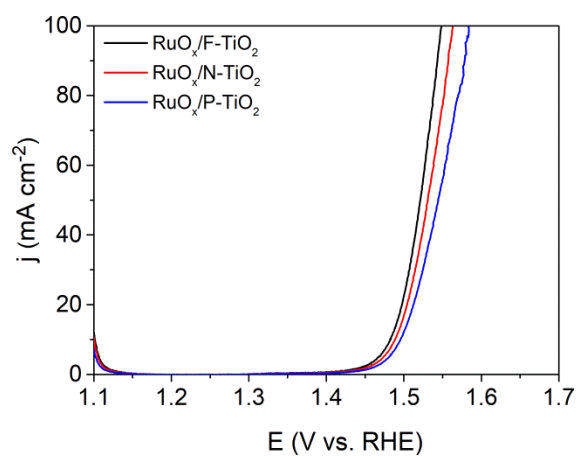

**Fig. S2** LSV curves of RuO<sub>x</sub>/F-TiO<sub>2</sub>, RuO<sub>x</sub>/N-TiO<sub>2</sub> and RuO<sub>x</sub>/P-TiO<sub>2</sub>.

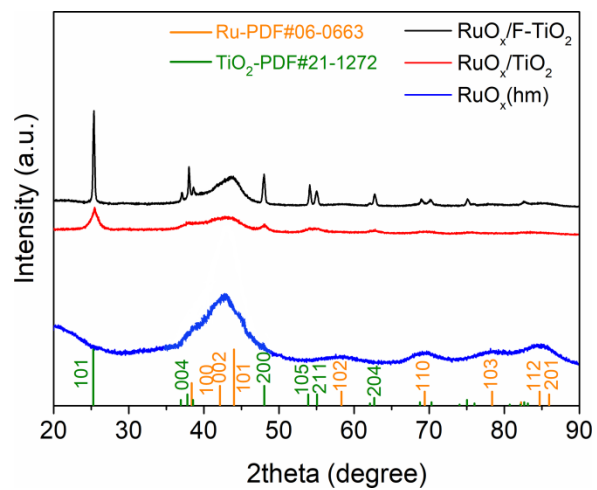

**Fig. S3** XRD patterns of RuO<sub>x</sub>/F-TiO<sub>2</sub>, RuO<sub>x</sub>/TiO<sub>2</sub> and RuO<sub>x</sub>(hm).

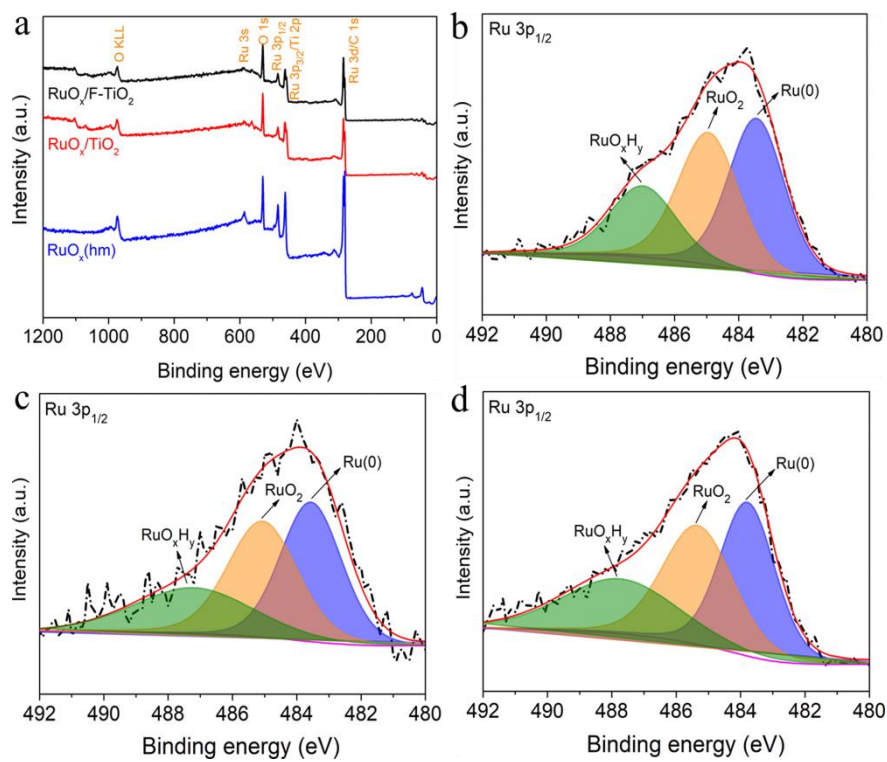

**Fig. S4** (a) XPS survey spectra. High-resolution XPS spectra of the deconvoluted Ru 3p<sub>1/2</sub> for (b) RuO<sub>x</sub>/F-TiO<sub>2</sub>, (c) RuO<sub>x</sub>/TiO<sub>2</sub> and (d) RuO<sub>x</sub>(hm).



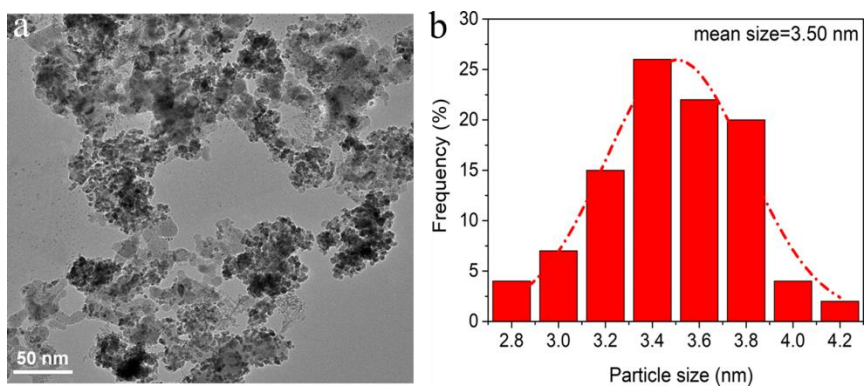

**Fig. S5** (a) TEM image of RuO<sub>x</sub>/TiO<sub>2</sub> and (b) corresponding histogram of the particle size distribution.

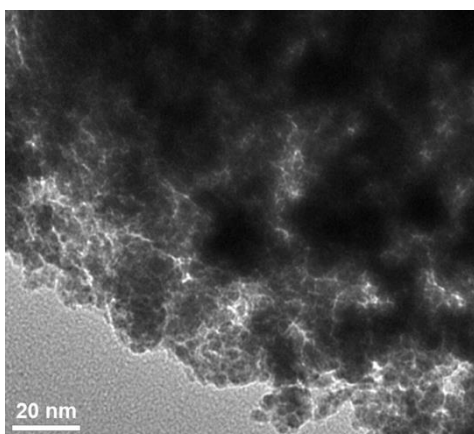

**Fig. S6** TEM image of RuO<sub>x</sub>(hm).

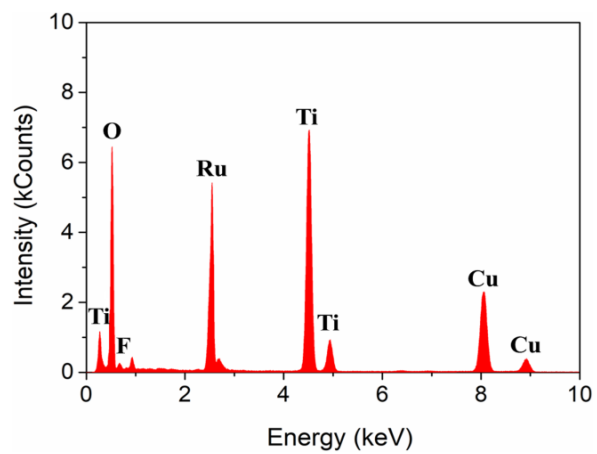

**Fig. S7** EDX spectrum of RuO<sub>x</sub>/F-TiO<sub>2</sub>.

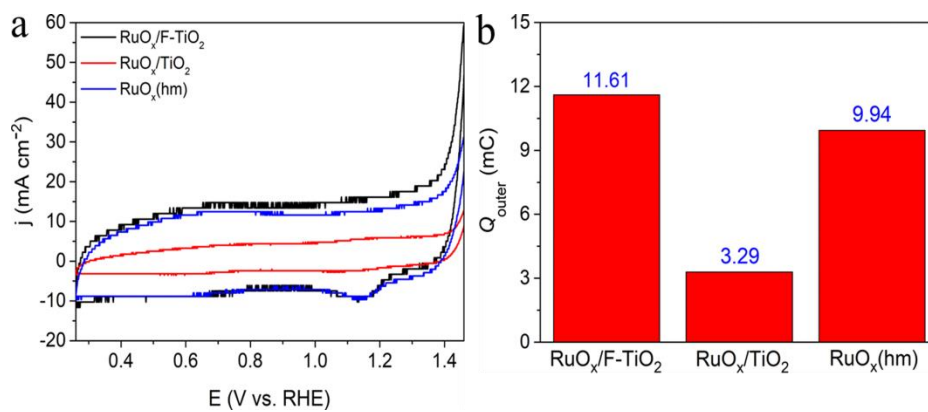

**Fig. S8** (a) CV curves at the scanning rate of 300 mV s<sup>-1</sup> in N<sub>2</sub>-saturated 0.5 M H<sub>2</sub>SO<sub>4</sub> solution. (b) Histograms of the outer charge.

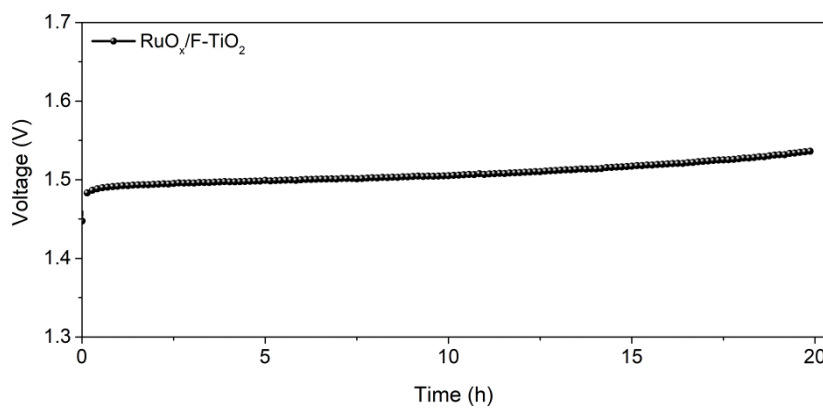

**Fig. S9** Galvanostatic test of RuO<sub>x</sub>/F-TiO<sub>2</sub> at the constant current density of 10 mA cm<sup>-2</sup> for 20 h.

**Table S1** XPS analysis of the catalysts.

| Catalyst                             | Binding energy (Ru 3p <sub>1/2</sub> ; eV) | Binding energy (eV) and Relative content (%) of Ru species |                  |                                 |
|--------------------------------------|--------------------------------------------|------------------------------------------------------------|------------------|---------------------------------|
|                                      |                                            | Ru(0)                                                      | RuO <sub>2</sub> | RuO <sub>x</sub> H <sub>y</sub> |
| RuO <sub>x</sub> /F-TiO <sub>2</sub> | 483.80                                     | 483.439;                                                   | 484.943;         | 486.983;                        |
|                                      |                                            | 40.82%                                                     | 37.32%           | 21.86%                          |
| RuO <sub>x</sub> /TiO <sub>2</sub>   | 484.00                                     | 483.559;                                                   | 485.061;         | 487.202;                        |
|                                      |                                            | 38.17%                                                     | 36.88%           | 24.95%                          |
| RuO <sub>x</sub> (hm)                | 484.15                                     | 483.785;                                                   | 485.329;         | 487.747;                        |
|                                      |                                            | 36.49%                                                     | 36.25%           | 27.26%                          |

**Table S2**  $R_s$  and  $R_{ct}$  values fitted from the EIS.

| Catalyst                             | $R_s$ ( $\Omega$ ) | $R_{ct}$ ( $\Omega$ ) |
|--------------------------------------|--------------------|-----------------------|
| RuO <sub>x</sub> /F-TiO <sub>2</sub> | 5.5                | 21.2                  |
| RuO <sub>x</sub> /TiO <sub>2</sub>   | 5.8                | 41.3                  |
| RuO <sub>x</sub> (hm)                | 5.5                | 32.8                  |
| IrO <sub>2</sub> (CM)                | 5.6                | 44.0                  |
